# Supplementary material for: Gene Regulatory Network of the Noncoding RNA Qrr5 Involved in the Cytotoxicity of Vibrio parahaemolyticus during Infection
Source: MDPI journal article supplement (doi:10.3390/microorganisms10102084), 2022-10-21
Supplement: s1 [file s1]

**Gene regulatory network of the noncoding RNA *Qrr5* in the cytotoxicity of *Vibrio parahaemolyticus* during infection**

***Supplementary materials***

Fei Zha<sup>12#</sup>, Rui Pang<sup>2#</sup>, Shixuan Huang<sup>2</sup>, Jumei Zhang<sup>2</sup>, Juan Wang<sup>2</sup>, Moutong Chen<sup>2</sup>,  
Liang Xue<sup>2</sup>, Qinghua Ye<sup>2</sup>, Shi Wu<sup>2</sup>, Meiyan Yang<sup>2</sup>, Qihui Gu<sup>2</sup>, Yu Ding<sup>2</sup>, Hao Zhang<sup>1\*</sup>,  
Qingping Wu<sup>2\*</sup>

<sup>1</sup> School of Food Science and Technology, Jiangnan University, Wuxi 214122, Jiangsu, China

<sup>2</sup>Guangdong Provincial Key Laboratory of Microbial Safety and Health, Ministry of Agriculture and Rural Affairs, Key Laboratory of Agricultural Microbiomics and Precision Application, State Key Laboratory of Applied Microbiology Southern China, Institute of Microbiology, Guangdong Academy of Sciences, Guangzhou 510070, Guangdong, China

#These authors have contributed equally to this work.

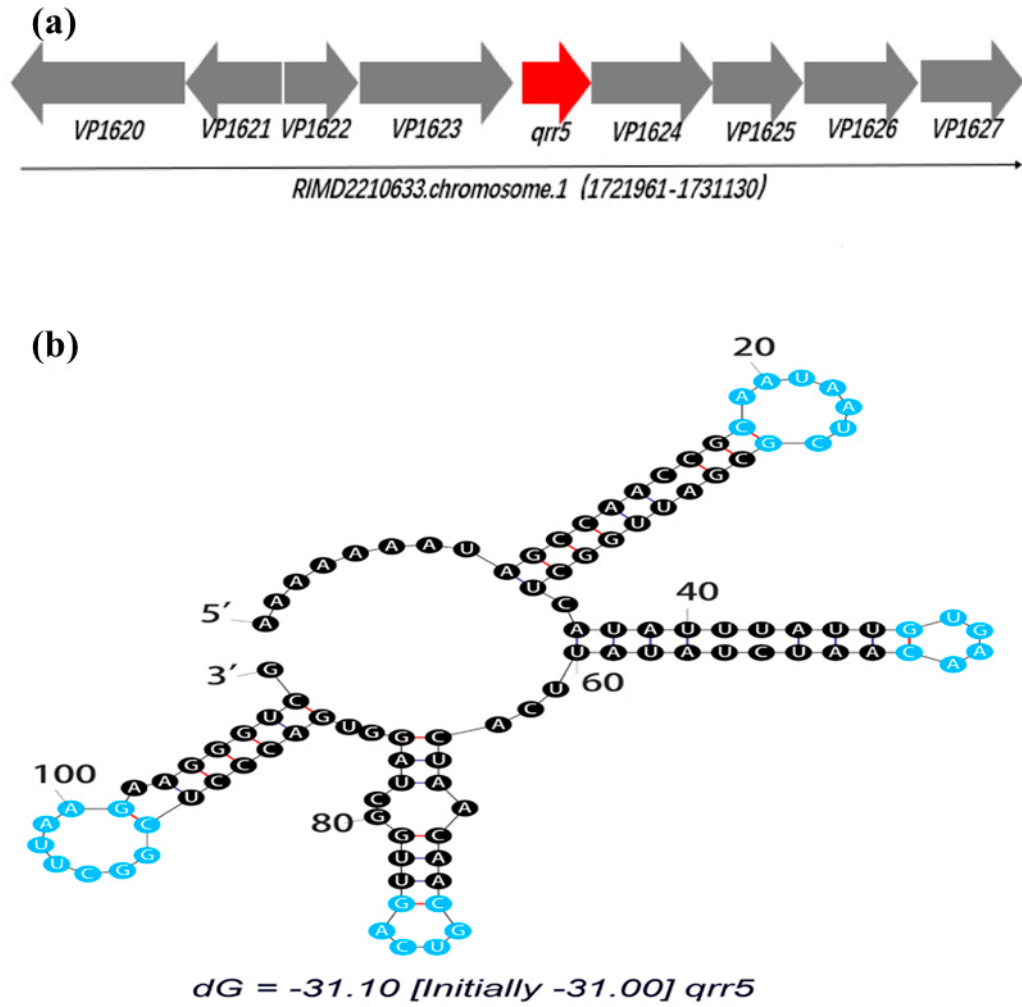

**Figure S1.** The genetic map and structure of sRNA *Qrr5* in *V. parahaemolyticus*.

(a) The position of *Qrr5* in the RIMD2210633 chromosome 1. (b) The secondary structure of *Qrr5* (109 bp) in *V. parahaemolyticus*.

**Table S1.** Oligonucleotide Primers

| Primer                       | Sequence (5'—3')                            |
|------------------------------|---------------------------------------------|
| For the construction of the  |                                             |
| <i>Qrr5</i> -deletion mutant |                                             |
| <i>Qrr5</i> -U-F             | CTTCTAGAGGTACCGCATGCGCTGCTAAAA<br>GAAG      |
| <i>Qrr5</i> -U-R             | ATGCATAATACTTCTGCCTGTCGTATATGA              |
| <i>Qrr5</i> -D-F             | TCATATACGACAGGCAGAAGTATTATGCAT              |
| <i>Qrr5</i> -D-R             | GTGGAATTCCCGGGAGAGCTGTGATCAGCT<br>TCGCTAAGG |
| <i>Qrr5</i> -F100            | AAGTGAAGCGCGCCGTACCAACCTCATTAC<br>CGAT      |
| <i>Qrr5</i> -R100            | ATCGCGTTTCTCTACCTGAC                        |
| <i>Qrr5</i> -pF              | GCTCTAGAGTGAGGGAAGTGCAATTTGC                |
| <i>Qrr5</i> -pR              | CCTCGAGCGACCCTTCTTAAGCCGAG                  |
| For quantitative PCR         |                                             |
| 16s-F                        | AAGCGTGGGGAGCAAACAG                         |
| 16-R                         | CGAAGGCACCAATCCATCTC                        |
| <i>qrr1</i> -F               | CGACCCCTCGGGTCACCTAG                        |
| <i>qrr1</i> -R               | AAAAAAGAAGCCAATAGGCAGTCGG                   |
| <i>qrr2</i> -F               | GACCCTTATTAAGCCGAGGG                        |

|                |                         |
|----------------|-------------------------|
| <i>qrr2</i> -R | AGAAAAAACGCCAATCACA     |
| <i>qrr3</i> -F | TGACCCTTTCTAAGCCGAG     |
| <i>qrr3</i> -R | AAAAAAAAAAGCCAACCACAAGG |
| <i>qrr4</i> -F | CGAGGGTCACCTAGCCAACT    |
| <i>qrr4</i> -R | AAATAGCCAACCGCAAAGAG    |
| <i>qrr5</i> -F | AAAAAAATAGCCAACCGCAA    |
| <i>qrr5</i> -R | CGACCCTTCTTAAGCCG       |
| VP1766-F       | AAACAATGCGTGAGCCAGAC    |
| VP1766-R       | ACCAAACAGAACTCACCTCCAC  |
| VPA1068-F      | GAAAACACCCGCCAACATTAC   |
| VPA1068-R      | TCGCACTTCGGCATCATTG     |
| VP2492-F       | GAACAGCAAGAATGACCAAAGC  |
| VP2492-R       | TGTACGTCGATAACGGAGAAGG  |
| VP0485-F       | GCAGTACGATGGCGAAAGC     |
| VP0485-R       | ACACCAAAGCGGGGACAA      |
| VP2914-F       | ATTTGCACAAACCTTCCACATC  |
| VP2914-R       | GAGCAACAAGCTGGCTTCATC   |
| VP0486-F       | CAAGCGAACCTTGAACCTGAGA  |
| VP0486-R       | GCCCGTAACAGTCGTTGTAATC  |
| VPA0628-F      | CGGTTGTGATTGCACTGGG     |
| VPA0628-R      | TCGCCTTTTGGCAGATGAG     |
| VP1665-F       | TGTTGAGTGTGCGGAAGCG     |

VP1665-R

ATCAGTCGGGCGAGCGTAT

---

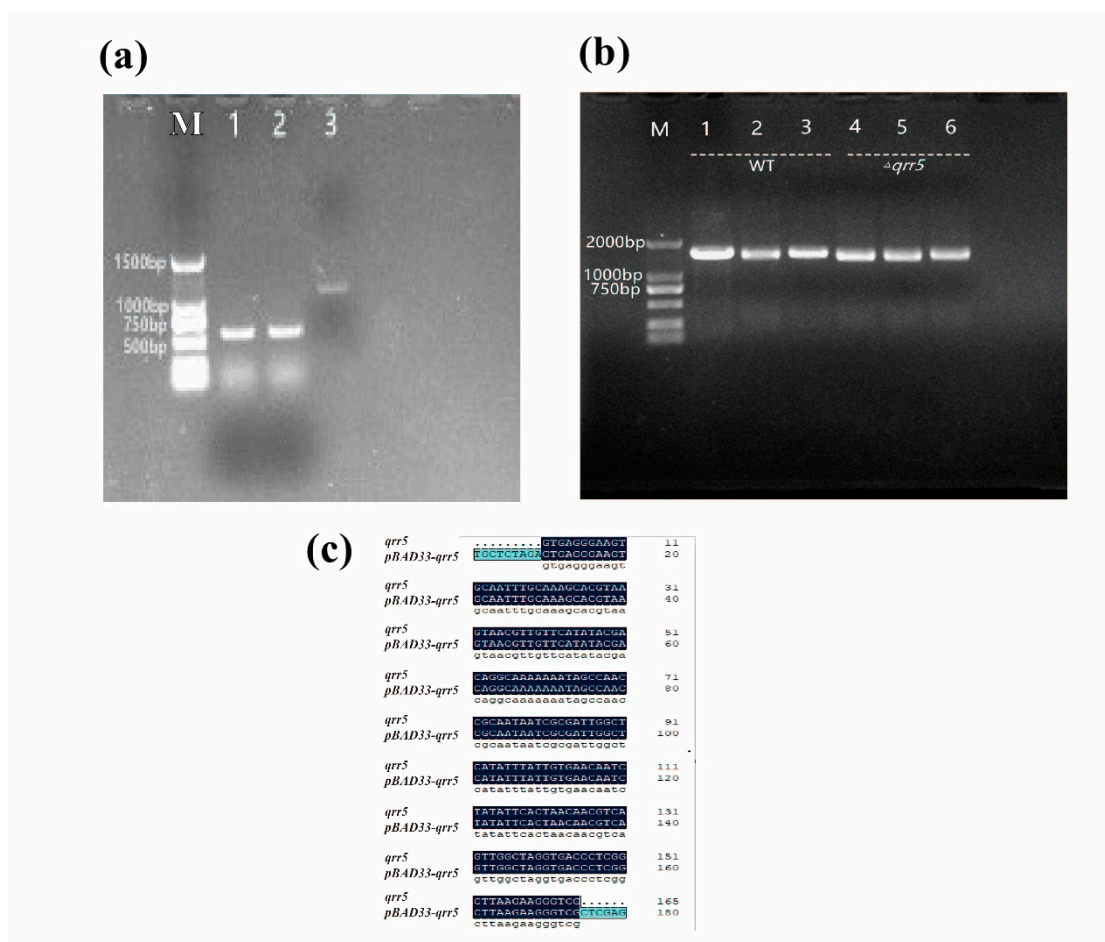

PCR with primers *Qrr5*-pF/*Qrr5*-pR using the *V.parahaemolyticus* $\Delta$ *Qrr5*::*pBAD33*-*Qrr5* chromosomal DNA as templates compared to the sequence of *Qrr5*.

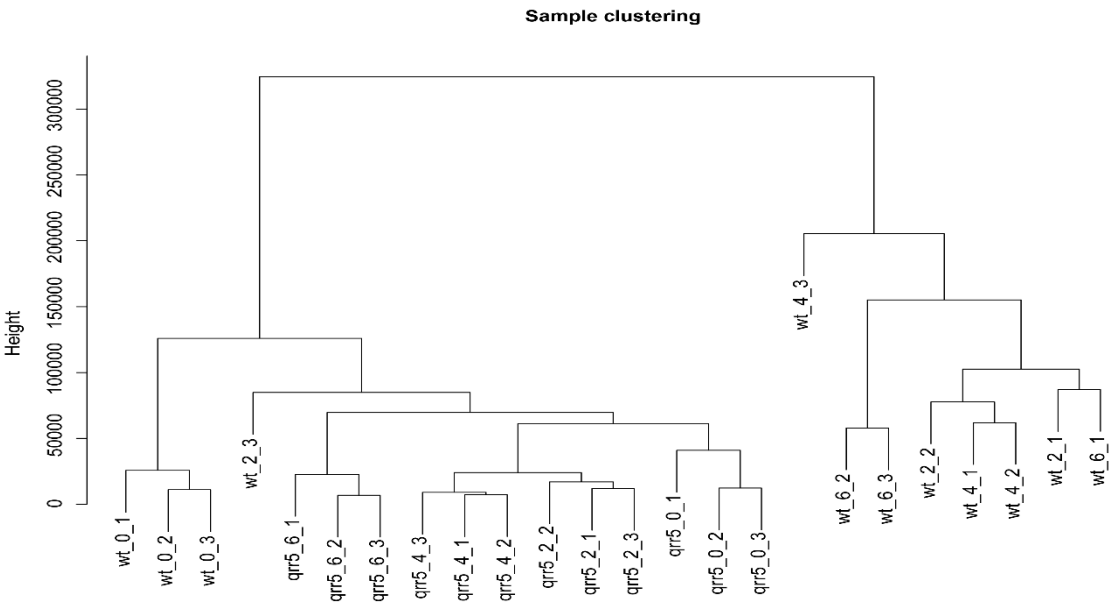

**Figure S3.** Each sample clustering of RNA-Seq data.

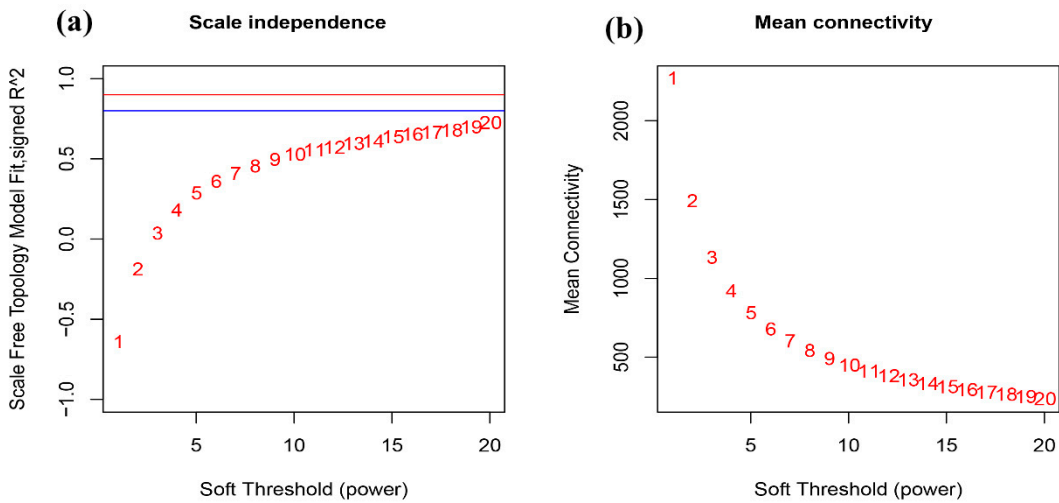

**Figure S4.** The scale independence (a) and mean connectivity (b) of RNA-Seq data.

**Table S2.** The function of genes in the WGCNA co-expression network

| <b>Name</b>    | <b>Function</b>                                  |
|----------------|--------------------------------------------------|
| <i>VP1766</i>  | Alanyl-tRNA editing protein                      |
| <i>VP1600</i>  | Unknown                                          |
| <i>VPA1068</i> | Hypothetical protein                             |
| <i>VP2914</i>  | D-2-hydroxyacid dehydrogenase                    |
| <i>VP0027</i>  | Hypothetical protein                             |
| <i>VP0807</i>  | Unknown                                          |
| <i>VP0486</i>  | Diguanylate cyclase                              |
| <i>VPA1520</i> | Hypothetical protein                             |
| <i>VP2389</i>  | Magnesium transporter                            |
| <i>VP2492</i>  | Ammonium transporter                             |
| <i>VP2112</i>  | Unknown                                          |
| <i>VPA0631</i> | Heme synthase (cyoE)                             |
| <i>VPA1141</i> | Carboxymuconolactone decarboxylase               |
| <i>VP0485</i>  | TIGR01212 family radical SAM protein             |
| <i>VPA0628</i> | Cytochrome ubiquinol oxidase subunit I<br>(cyoB) |
| <i>VP1665</i>  | Type III secretion I chaperone SycN              |
| <i>VP2012</i>  | Unknown                                          |



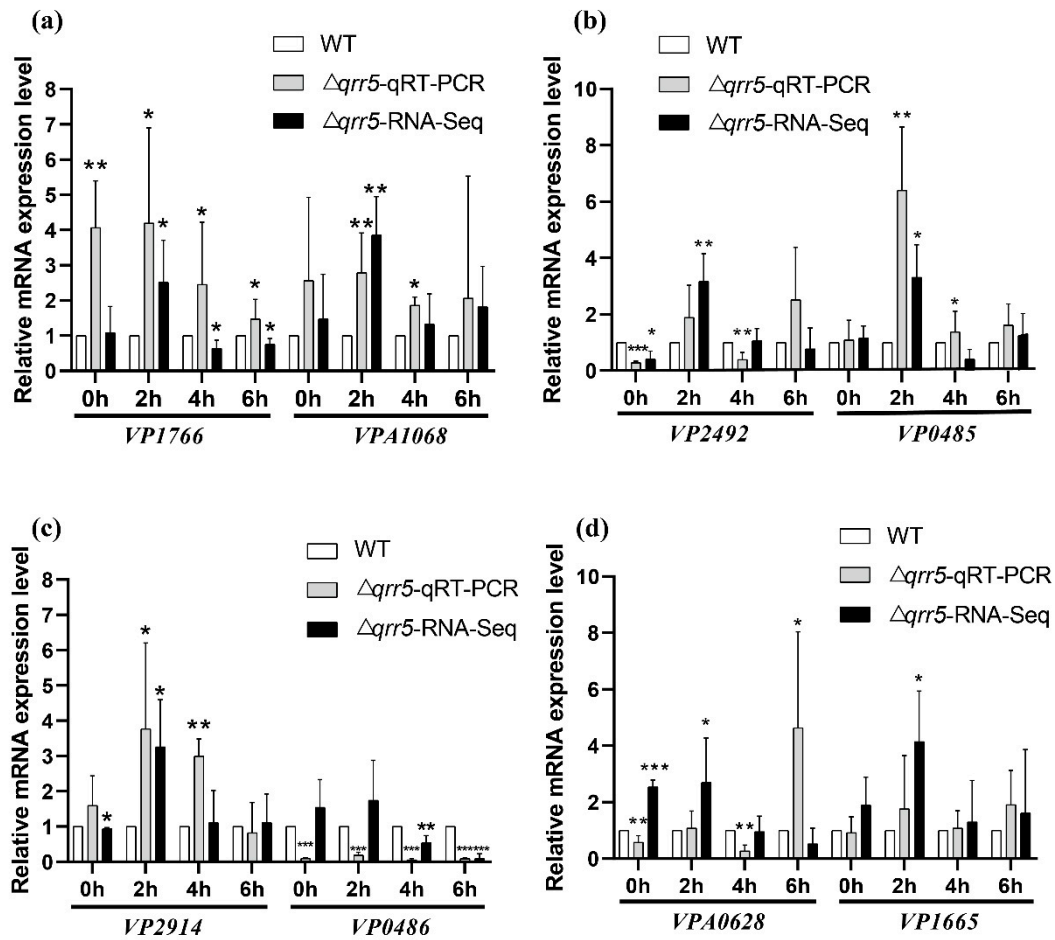

**Figure S5.** Relative expression of several differentially expressed genes ( $\Delta Qrr5$ /WT) at the mRNA level determined by qPCR during various infection periods. (a) The expression of  $VP1766$  and  $VP1068$  by qRT-PCR analysis. (b) The expression of  $VP2492$  and  $VP0485$  by qRT-PCR analysis. (c) The expression of  $VP2914$  and  $VP0486$  by qRT-PCR analysis. (d) The expression of  $VP0628$  and  $VP1665$  by qRT-PCR analysis.
